# Supplementary material for: Monometallic lanthanide complexes with tridentate 2,6-dicarboxamidopyridine ligands. Influence of peripheral substitutions on steric congestion and antenna effect
Source: Royal Society of Chemistry journal article supplement (doi:10.1039/b307413g), 2003-01-01
Supplement: b307413g.pdf [file b307413g.pdf]

**Monometallic lanthanide complexes with tridentate 2,6-dicarboxamido-pyridine ligands. Influence of peripheral substitutions on steric congestion and antenna effect**

---

Thierry Le Borgne, Jean-Marc Bénech, Sébastien Floquet, Gérald Bernardinelli, Christian Aliprandini, Philippe Bettens, and Claude Piguet \*

**Supporting Information**

Table S1 Selected  $^1\text{H}$  NMR chemical shifts ( $\delta$  /ppm vs TMS) for the ligands **L5-L8** ( $d^6$ -DMSO, 298 K).

| Ligand                | H1   | H2   | H5   | H6   | H7   | H8   | H9   | H10  |
|-----------------------|------|------|------|------|------|------|------|------|
| <b>L5<sup>a</sup></b> | 7.87 | 7.63 | 3.56 | 1.26 | -    | 3.34 | 1.15 | -    |
| <b>L6</b>             | 7.91 | 7.39 | 3.56 | 1.39 | 1.39 | 3.54 | 1.05 | 1.05 |
| <b>L7</b>             | 8.23 | 8.12 | 4.56 | -    | -    | -    | -    | -    |
| <b>L8</b>             | 8.00 | 7.69 | 4.49 | 4.26 | -    | -    | -    | -    |

<sup>a</sup> Taken from ref. 19 in  $\text{CD}_3\text{CN}$ .

Table S2 Elemental analyses for the complexes  $[\text{Ln}(\text{L6})_2](\text{CF}_3\text{SO}_3)_3 \cdot x\text{H}_2\text{O} \cdot y\text{THF}$  ( $\text{Ln} = \text{Eu}$ ,  $x = 2$ ,  $y = 0$ : **1**;  $\text{Ln} = \text{Gd}$ ,  $x = y = 0$ : **2**;  $\text{Ln} = \text{Tb}$ ,  $x = y = 0$ : **3**;  $\text{Ln} = \text{Lu}$ ,  $x = 0$ ,  $y = 1.5$ : **4**) and  $[\text{Ln}(\text{L7})_2](\text{CF}_3\text{SO}_3)_3 \cdot x\text{H}_2\text{O} \cdot y\text{THF}$  ( $\text{Ln} = \text{Eu}$ ,  $x = 1$ ,  $y = 0$ : **5**;  $\text{Ln} = \text{Gd}$ ,  $x = 0$ ,  $y = 2$ : **6**;  $\text{Ln} = \text{Tb}$ ,  $x = 3$ ,  $y = 0$ : **7**;  $\text{Ln} = \text{Lu}$ ,  $x = 1$ ,  $y = 0$ : **8**). Calculated values are given in parentheses.

| Compound                                                                                    | % C          | % H        | % N        |
|---------------------------------------------------------------------------------------------|--------------|------------|------------|
| $[\text{Eu}(\text{L6})_2](\text{CF}_3\text{SO}_3)_3 \cdot 2\text{H}_2\text{O}$ ( <b>1</b> ) | 38.1 (38.05) | 4.8 (4.52) | 6.5 (6.49) |
| $[\text{Gd}(\text{L6})_2](\text{CF}_3\text{SO}_3)_3$ ( <b>2</b> )                           | 38.8 (38.73) | 5.0 (4.92) | 6.4 (6.61) |
| $[\text{Tb}(\text{L6})_2](\text{CF}_3\text{SO}_3)_3$ ( <b>3</b> )                           | 39.1 (38.68) | 5.2 (4.91) | 6.3 (6.60) |
| $[\text{Lu}(\text{L6})_2](\text{CF}_3\text{SO}_3)_3 \cdot 1.5\text{THF}$ ( <b>4</b> )       | 40.7 (40.40) | 5.4 (5.34) | 6.4 (6.01) |
| $[\text{Eu}(\text{L7})_2](\text{CF}_3\text{SO}_3)_3 \cdot \text{H}_2\text{O}$ ( <b>5</b> )  | 52.8 (52.55) | 4.1 (3.87) | 5.0 (5.04) |
| $[\text{Gd}(\text{L7})_2](\text{CF}_3\text{SO}_3)_3 \cdot 2\text{THF}$ ( <b>6</b> )         | 54.2 (54.1)  | 4.5 (4.37) | 4.7 (4.67) |
| $[\text{Tb}(\text{L7})_2](\text{CF}_3\text{SO}_3)_3 \cdot 3\text{H}_2\text{O}$ ( <b>7</b> ) | 51.0 (51.23) | 4.1 (4.00) | 4.7 (4.91) |
| $[\text{Lu}(\text{L7})_2](\text{CF}_3\text{SO}_3)_3 \cdot \text{H}_2\text{O}$ ( <b>8</b> )  | 52.1 (51.84) | 4.0 (3.81) | 4.9 (4.97) |

Table S3 Calculated distribution of isomers for  $[\text{Ln}(\mathbf{L8})_3]^{3+}$  by using a statistical 1:2:1 distribution of the *EE:EZ:ZZ* conformers for each ligand strand.

| Isomers            | Degeneracy | Distribution / % | Point group |
|--------------------|------------|------------------|-------------|
| $(EE)^3$           | 1          | 1.6              | $D_3$       |
| $(ZZ)^3$           | 1          | 1.6              | $D_3$       |
| $(EE)^2(ZZ)$       | 3          | 4.7              | $C_2$       |
| $(EE)(ZZ)^2$       | 3          | 4.7              | $C_2$       |
| $(EE)^2(EZ)$       | 6          | 9.3              | $C_1$       |
| Syn- $(EE)(EZ)^2$  | 6          | 9.3              | $C_2$       |
| Anti- $(EE)(EZ)^2$ | 6          | 9.8              | $C_1$       |
| $(ZZ)^2(EZ)$       | 6          | 9.3              | $C_1$       |
| Syn- $(ZZ)(EZ)^2$  | 6          | 9.3              | $C_2$       |
| Anti- $(ZZ)(EZ)^2$ | 6          | 9.3              | $C_1$       |
| $(EE)(ZZ)(EZ)$     | 12         | 18.8             | $C_1$       |
| Mer- $(EZ)^3$      | 6          | 9.3              | $C_1$       |
| Fac- $(EZ)^3$      | 2          | 3.2              | $C_3$       |

Table S4 Selected structural data for the lanthanide coordination spheres in  
 $[\text{Tb}(\mathbf{L8})_3]_2(\text{CF}_3\text{SO}_3)_6(\text{C}_3\text{H}_5\text{N})_3(\text{H}_2\text{O})$  (**11**).

|                                     |            | Angles $\phi^a / ^\circ$                      |                          |          |
|-------------------------------------|------------|-----------------------------------------------|--------------------------|----------|
| Compd                               | <b>11a</b> | <b>11b</b>                                    | Perfect TTP <sup>b</sup> |          |
| R <sup>1</sup> -Tb-R <sup>2</sup>   | 178.1      | 178.9                                         | 180                      |          |
|                                     |            | Angles $\theta_i^a / ^\circ$ (distal tripods) |                          |          |
| Compd                               | <b>11a</b> | <b>11b</b>                                    | Perfect TTP <sup>b</sup> |          |
| R <sup>1</sup> -Tb-O1b              | 49.7       | R <sup>1</sup> -Tb-O1d                        | 47.4                     | $\alpha$ |
| R <sup>1</sup> -Tb-O1a              | 48.5       | R <sup>1</sup> -Tb-O2e                        | 47.6                     | $\alpha$ |
| R <sup>1</sup> -Tb-O1c              | 49.7       | R <sup>1</sup> -Tb-O2f                        | 45.0                     | $\alpha$ |
| R <sup>2</sup> -Tb-O2a              | 50.6       | R <sup>2</sup> -Tb-O2d                        | 49.1                     | $\alpha$ |
| R <sup>2</sup> -Tb-O2b              | 46.5       | R <sup>2</sup> -Tb-O1e                        | 47.7                     | $\alpha$ |
| R <sup>2</sup> -Tb-O2c              | 47.9       | R <sup>2</sup> -Tb-O1f                        | 46.0                     | $\alpha$ |
|                                     |            | Angles $\omega_{ij}^a / ^\circ$               |                          |          |
| Compd                               | <b>11a</b> | <b>11b</b>                                    | Perfect TTP <sup>b</sup> |          |
| Proj[O1a]-Tb-Proj[O2b] <sup>c</sup> | 12.4       | Proj[O1d]-Tb-Proj[O1f]                        | 13.6                     | 0        |
| Proj[O1b]-Tb-Proj[O2c]              | 9.6        | Proj[O2e]-Tb-Proj[O2d]                        | 15.5                     | 0        |
| Proj[O2a]-Tb-Proj[O2c]              | 10.8       | Proj[O1e]-Tb-Proj[O2f]                        | 13.0                     | 0        |

<sup>a</sup> For the definition of  $\phi$ ,  $\theta_i$  and  $\omega_{ij}$ , see the associated scheme. The error in the angles is typically 0.5°. <sup>b</sup> TTP = tricapped trigonal prism. <sup>c</sup> Proj[O(*i*)] and Proj[N(*i*)] are the projections of O(*i*) and respectively N(*i*) along the R<sup>1</sup>-R<sup>2</sup> direction onto a perpendicular plane passing through the lanthanide atom. R<sup>1</sup> = Tb-O1a + Tb-O1b + Tb-O1c and R<sup>2</sup> = Tb-O2a + Tb-O2b + Tb-O2c.

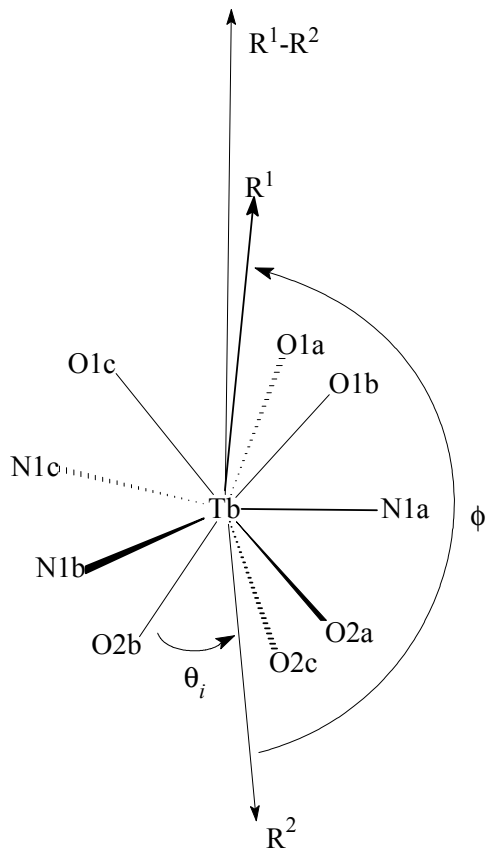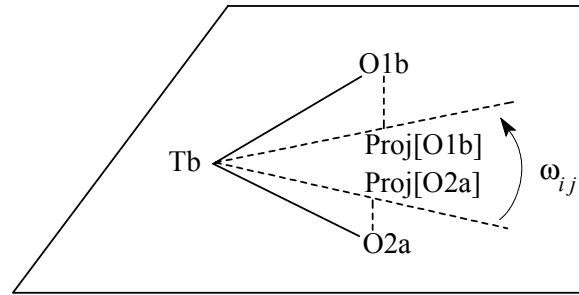

Table S5 Intra- and intermolecular stacking (S) and “edge to face” (T) interactions occurring in

the crystals of  $[\text{Tb}(\mathbf{L8})_3]_2(\text{CF}_3\text{SO}_3)_6(\text{CH}_3\text{CH}_2\text{CN})_3(\text{H}_2\text{O})$  (**11**,  $\phi$  = benzyl, Py = pyridine)

|           | Pya | $\phi$ 1a      | $\phi$ 2a      | Pyb | $\phi$ 1b | $\phi$ 2b | Pyc | $\phi$ 1c      | $\phi$ 2c      | Pyd            | $\phi$ 1d      | $\phi$ 2d | Pye            | $\phi$ 1e      | $\phi$ 2e | Pyf | $\phi$ 1f | $\phi$ 2f |
|-----------|-----|----------------|----------------|-----|-----------|-----------|-----|----------------|----------------|----------------|----------------|-----------|----------------|----------------|-----------|-----|-----------|-----------|
| Pya       |     |                |                |     |           | S         |     | S              |                |                |                |           |                |                |           |     |           |           |
| $\phi$ 1a |     |                | T <sup>2</sup> | S   |           |           |     |                |                |                |                |           |                |                |           |     |           |           |
| $\phi$ 2a |     | T <sup>2</sup> |                |     |           |           | T   | T              |                |                |                |           |                |                |           |     |           |           |
| Pyb       |     | S              |                |     |           |           |     |                | S              |                |                |           |                |                |           |     |           |           |
| $\phi$ 1b |     |                |                |     |           |           | T   |                | T              |                |                |           |                |                |           |     |           |           |
| $\phi$ 2b | S   |                |                |     |           |           |     |                |                |                |                |           |                |                |           |     |           |           |
| Pyc       |     |                | T              |     | T         |           |     |                |                |                |                |           |                |                |           |     |           |           |
| $\phi$ 1c | S   |                | T              |     |           |           |     |                |                | S <sup>1</sup> | T <sup>1</sup> |           |                |                |           |     |           |           |
| $\phi$ 2c |     |                |                | S   | T         |           |     |                |                |                |                |           | S <sup>3</sup> | T <sup>4</sup> |           |     |           |           |
| Pyd       |     |                |                |     |           |           |     | S <sup>1</sup> |                |                |                |           |                |                | S         |     |           |           |
| $\phi$ 1d |     |                |                |     |           |           |     | T <sup>1</sup> |                |                |                |           |                |                |           | T   |           |           |
| $\phi$ 2d |     |                |                |     |           |           |     |                |                |                |                |           | S              |                |           |     |           |           |
| Pye       |     |                |                |     |           |           |     |                | S <sup>3</sup> |                |                | S         |                |                |           |     |           |           |
| $\phi$ 1e |     |                |                |     |           |           |     |                | T <sup>4</sup> |                |                |           |                |                |           | T   |           |           |
| $\phi$ 2e |     |                |                |     |           |           |     |                |                | S              |                |           |                | T              |           |     |           |           |
| Pyf       |     |                |                |     |           |           |     |                |                |                | T              |           |                |                |           |     |           |           |
| $\phi$ 1f |     |                |                |     |           |           |     |                |                |                |                |           |                |                |           |     |           |           |
| $\phi$ 2f |     |                |                |     |           |           |     |                |                |                |                |           |                |                |           |     |           |           |

 Intramolecular       Intermolecular

<sup>1</sup> Between the two cations of the asymmetric unit. <sup>2</sup> Between x, y, z ( $\phi$ 2a) and 2-x, 3/2+y, -z ( $\phi$ 1a, interlayers). <sup>3</sup> Between x, y, z ( $\phi$ 2c) and x+1, y, z-1 (Pye, intralayer). <sup>4</sup> Between x, y, z ( $\phi$ 1e) and x-1, y, z+1 ( $\phi$ 2c, intralayer).

Table S6. Summary of crystal data, intensity measurement and structure refinement for **L8**, [Eu(**L6**)<sub>2</sub>(H<sub>2</sub>O)<sub>2</sub>(CF<sub>3</sub>SO<sub>3</sub>)] (CF<sub>3</sub>SO<sub>3</sub>)<sub>2</sub>(THF)<sub>1.5</sub> (**9**), [Gd(**L7**)<sub>2</sub>(H<sub>2</sub>O)<sub>2</sub>(CF<sub>3</sub>SO<sub>3</sub>)<sub>2</sub>](CF<sub>3</sub>SO<sub>3</sub>)<sub>2</sub>(BuOMe)<sub>2</sub> (**10**) and [Tb(**L8**)<sub>3</sub>]<sub>2</sub>(CF<sub>3</sub>SO<sub>3</sub>)<sub>6</sub>(CH<sub>3</sub>CH<sub>2</sub>CN)<sub>3</sub>(H<sub>2</sub>O) (**11**).

|                                               | <b>L8</b>                                                     | <b>9</b>                                                                                         | <b>10</b>                                                                                      | <b>11</b>                                                                                                        |
|-----------------------------------------------|---------------------------------------------------------------|--------------------------------------------------------------------------------------------------|------------------------------------------------------------------------------------------------|------------------------------------------------------------------------------------------------------------------|
| Formula                                       | C <sub>21</sub> H <sub>19</sub> N <sub>3</sub> O <sub>2</sub> | C <sub>47</sub> H <sub>78</sub> EuF <sub>9</sub> N <sub>6</sub> O <sub>16.5</sub> S <sub>3</sub> | C <sub>83</sub> H <sub>90</sub> F <sub>9</sub> GdN <sub>6</sub> O <sub>17</sub> S <sub>3</sub> | C <sub>141</sub> H <sub>131</sub> F <sub>18</sub> N <sub>21</sub> O <sub>31</sub> S <sub>6</sub> Tb <sub>2</sub> |
| Mol. wt.                                      | 345.4                                                         | 1410.5                                                                                           | 1868.2                                                                                         | 3468.1                                                                                                           |
| Crystal Size (mm)                             | 0.13 x 0.21 x 0.29                                            | 0.08 x 0.10 x 0.38                                                                               | 0.09 x 0.17 x 0.33                                                                             | 0.08 x 0.28 x 0.33                                                                                               |
| Crystal system                                | monoclinic                                                    | monoclinic                                                                                       | monoclinic                                                                                     | monoclinic                                                                                                       |
| Space Group                                   | <i>P</i> 2 <sub>1</sub> / <i>c</i>                            | <i>P</i> 2 <sub>1</sub> / <i>c</i>                                                               | <i>I</i> 2/ <i>a</i>                                                                           | <i>P</i> 2 <sub>1</sub>                                                                                          |
| a (Å)                                         | 15.9562(12)                                                   | 14.6845(6)                                                                                       | 24.0530(11)                                                                                    | 16.0103(7)                                                                                                       |
| b (Å)                                         | 11.0886(8)                                                    | 25.3495(13)                                                                                      | 15.0320(6)                                                                                     | 28.0794(13)                                                                                                      |
| c (Å)                                         | 9.9212(7)                                                     | 18.3302(8)                                                                                       | 48.983(3)                                                                                      | 17.3614(7)                                                                                                       |
| β (°)                                         | 97.695(9)                                                     | 101.303(5)                                                                                       | 99.378(6)                                                                                      | 93.889(5)                                                                                                        |
| V (Å <sup>3</sup> )                           | 1739.6(2)                                                     | 6691.0(6)                                                                                        | 17473.8(15)                                                                                    | 7787.0(6)                                                                                                        |
| Z                                             | 4                                                             | 4                                                                                                | 8                                                                                              | 2 (Z'=2)                                                                                                         |
| D <sub>x</sub> gr.cm <sup>-3</sup>            | 1.319                                                         | 1.400                                                                                            | 1.420                                                                                          | 1.479                                                                                                            |
| μ(MoKα) mm <sup>-1</sup>                      | 0.087                                                         | 1.118                                                                                            | 0.917                                                                                          | 1.080                                                                                                            |
| Tmin, Tmax                                    | 0.9795, 0.9893                                                | 0.8724, 0.9210                                                                                   | 0.8107, 0.9176                                                                                 | 0.7197, 0.9181                                                                                                   |
| ((sin θ)/λ) <sub>max</sub> (Å <sup>-1</sup> ) | 0.615                                                         | 0.615                                                                                            | 0.661                                                                                          | 0.615                                                                                                            |
| No. measured reflc.                           | 18736                                                         | 65007                                                                                            | 116662                                                                                         | 68845                                                                                                            |
| No. independent reflc.                        | 3365                                                          | 12398                                                                                            | 20939                                                                                          | 30394                                                                                                            |
| No. observed reflc.                           | 1564                                                          | 8091                                                                                             | 11243                                                                                          | 21740                                                                                                            |
| Criterion for observed                        | F <sub>o</sub>   > 4σ(F <sub>o</sub> )                        | F <sub>o</sub>   > 4σ(F <sub>o</sub> )                                                           | F <sub>o</sub>   > 4σ(F <sub>o</sub> )                                                         | F <sub>o</sub>   > 4σ(F <sub>o</sub> )                                                                           |
| Refinement (on F)                             | Full-matrix                                                   | Full-matrix                                                                                      | Full-matrix                                                                                    | Full-matrix                                                                                                      |
| No. parameters                                | 311                                                           | 778                                                                                              | 1157                                                                                           | 1946                                                                                                             |
| Weighting scheme <i>p</i> a)                  | 0.0002                                                        | 0.0002                                                                                           | 0.00015                                                                                        | 0.0003                                                                                                           |
| Maximum Δ/σ                                   | 0.002                                                         | 0.002                                                                                            | 0.18                                                                                           | 0.009                                                                                                            |
| Max. and min. Δρ (e.Å <sup>-3</sup> )         | 0.23, -0.19                                                   | 0.89, -0.66                                                                                      | 0.94, -1.39                                                                                    | 0.87, -0.66                                                                                                      |
| Flack parameter x                             | -                                                             | -                                                                                                | -                                                                                              | 0.069(12)                                                                                                        |
| S b) (all data)                               | 1.13                                                          | 1.22                                                                                             | 1.12                                                                                           | 1.51                                                                                                             |
| R c), ωR d)                                   | 0.031, 0.031                                                  | 0.033, 0.035                                                                                     | 0.037, 0.037                                                                                   | 0.041, 0.042                                                                                                     |

a)  $\omega = 1/[\sigma^2(F_o) + p(F_o)^2]$  ; b)  $S = [\Sigma \{((F_o - F_c) / \sigma(F_o))^2\} / (N_{ref} - N_{var})]^{1/2}$

$$c) R = \frac{\sum \|F_{0i}\| - \|F_c\|}{\sum \|F_{0i}\|} \quad ; \quad d) \omega R = \left[ \frac{\sum (\omega \|F_{0i}\| - \|F_c\|)^2}{\sum \omega \|F_{0i}\|^2} \right]^{1/2}$$



a)

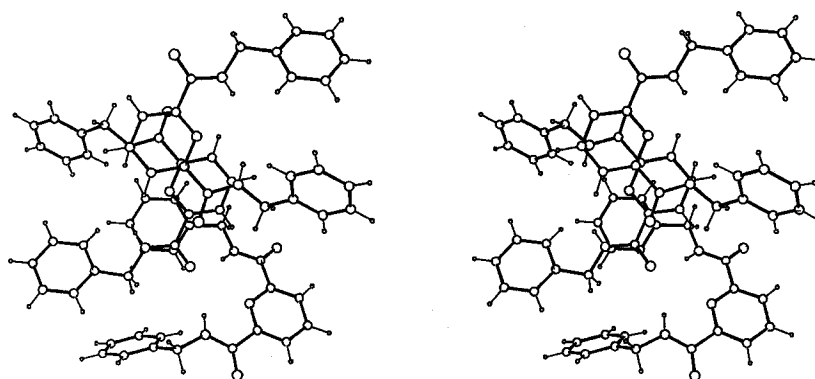

b)

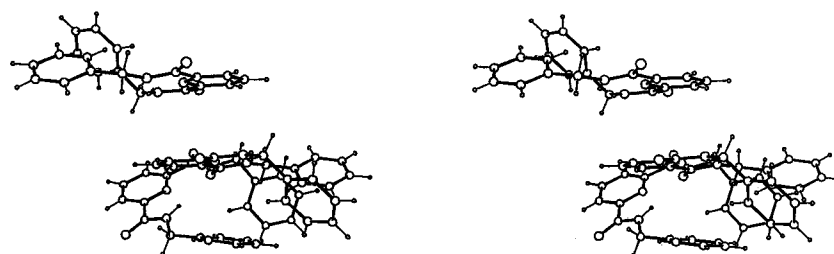

Figure S1 Stereoview of ligands **L8** in the crystal highlighting a) intermolecular hydrogen bonding ( $N2H02 \cdots O2' = 2.22(3) \text{ \AA}$ ,  $N2-H02 \cdots O2' = 154(2)^\circ$  and  $N3H03 \cdots O2' = 2.26(3) \text{ \AA}$ ,  $N2-H02 \cdots O2' = 165(2)^\circ$ , primed atoms correspond to  $x, \frac{1}{2}-y, \frac{1}{2}+z$ ), and b) intermolecular offset face-to-face aromatic stacking interactions involving pyridine-pyridine pairs through a centre of inversion, and pyridine-benzyl pairs through a glide plane.

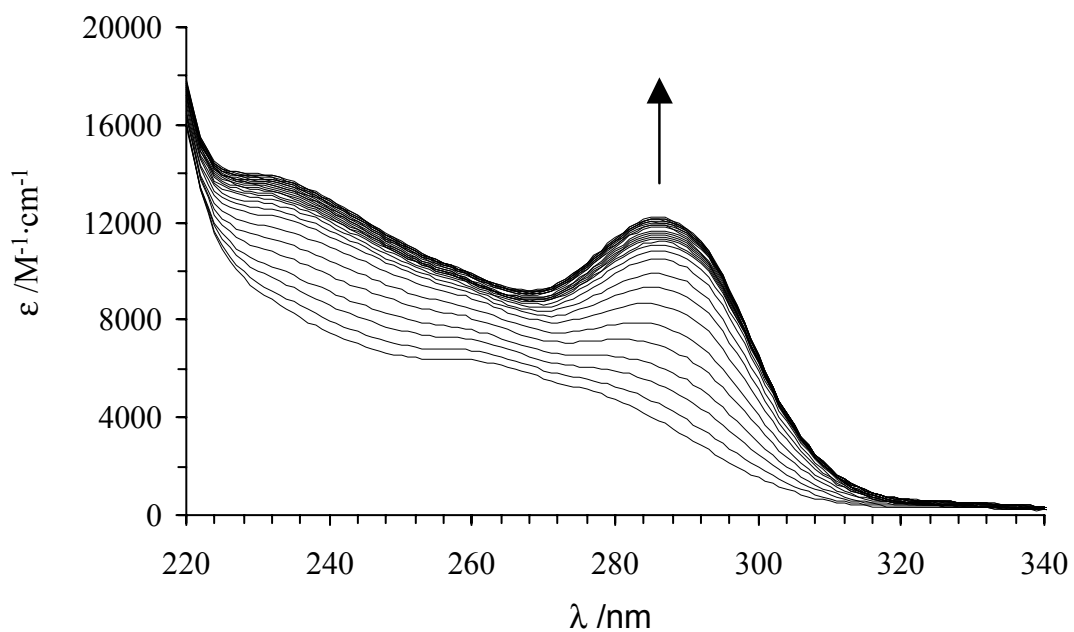

Figure S2 Variation of the absorption spectra observed for the spectrophotometric titration of **L7** ( $10^{-4} \text{ mol} \cdot \text{dm}^{-3}$  in acetonitrile) with  $\text{Lu}(\text{CF}_3\text{SO}_3)_3 \cdot 2\text{H}_2\text{O}$  at 293 K (Lu:**L7** = 0.1-1.5).

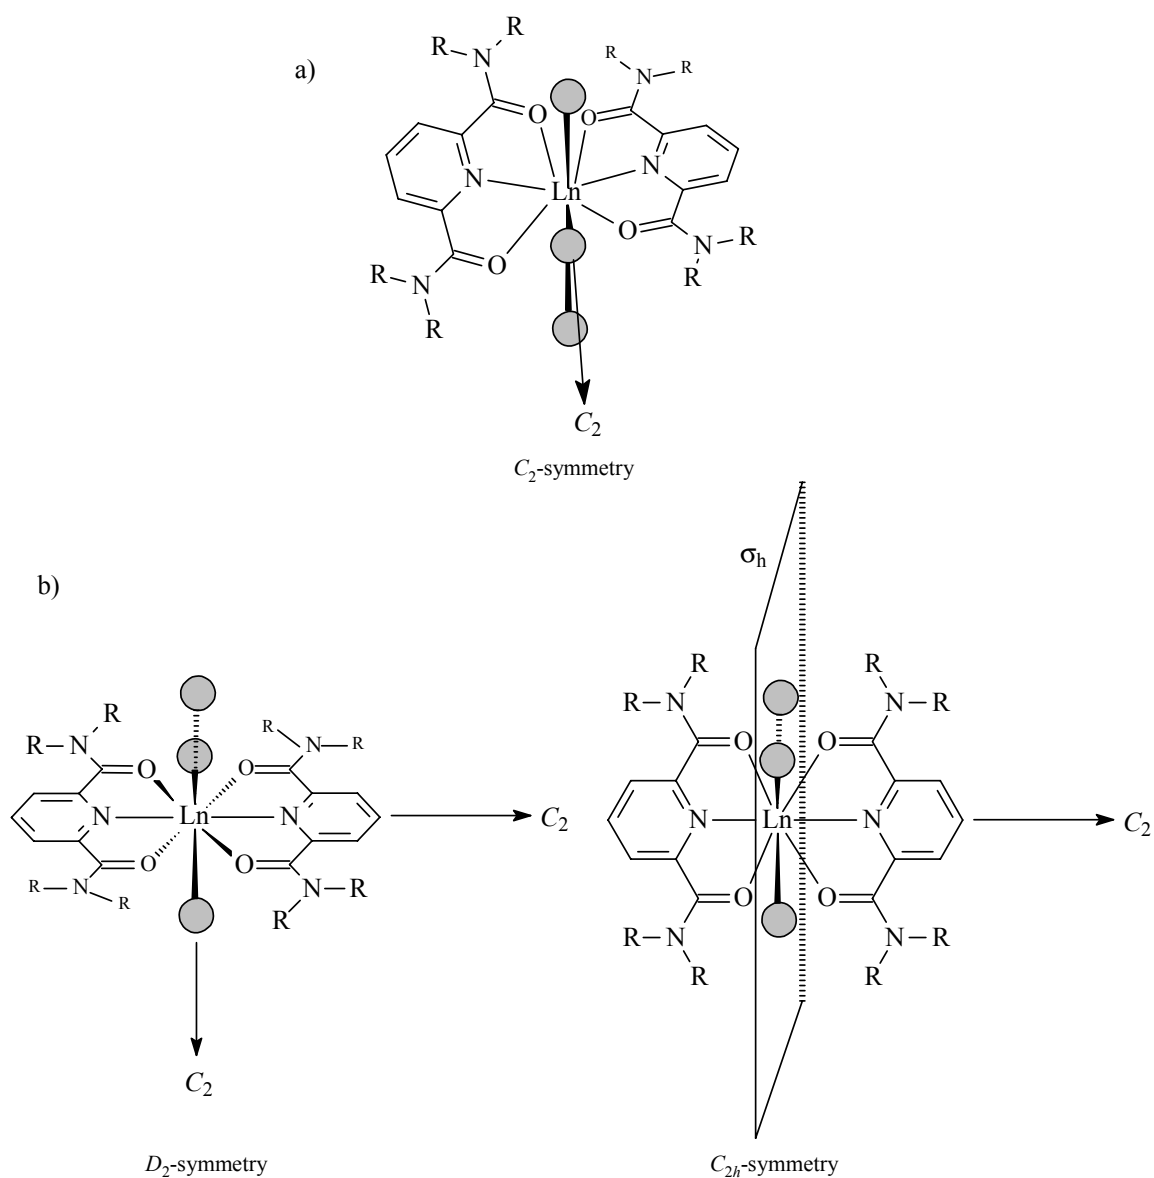

Figure S3 Dynamically-average structures observed in solution on the NMR time scale for a)  $[\text{Ln}(\mathbf{L6})_2]^{2+}$  ( $C_2$ -symmetry: the twofold axis is located along the central Ln-solvent bond) and b)  $[\text{Ln}(\mathbf{L7})_2]^{2+}$  ( $D_2$ -symmetry or  $C_{2h}$ -symmetry: the solvent molecules (represented with grey spheres) occupy dynamically average positions within the meridional plane).

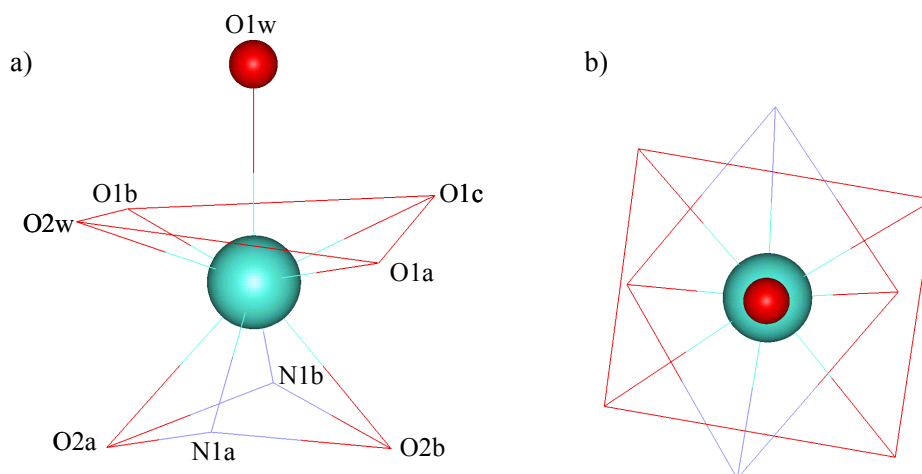

Figure S4 Perspective views of the co-ordination sphere in  $[\text{Gd}(\text{L7})_2(\text{H}_2\text{O})_2(\text{CF}_3\text{SO}_3)]^{2+}$  a) perpendicular and b) along the Gd-O1w bond, thus highlighting the distorted monocapped square antiprismatic arrangements of the nine donor atoms.

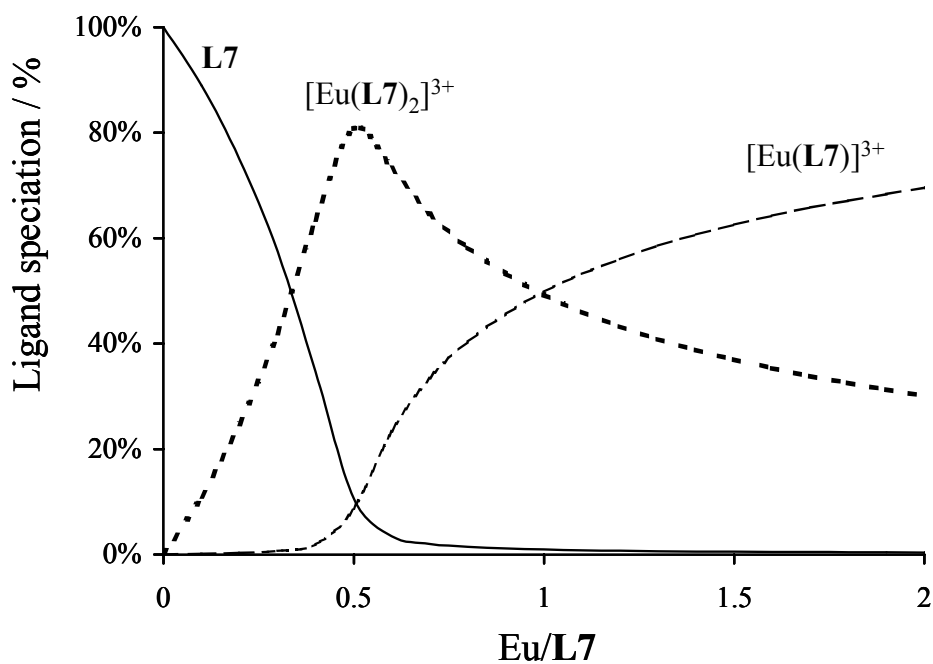

Figure S5 Distribution curves (ligand speciation) for the complexation of **L7** with  $\text{Eu}(\text{CF}_3\text{SO}_3)_3 \cdot 2\text{H}_2\text{O}$  (acetonitrile, total ligand concentration:  $2 \cdot 10^{-3} \text{ mol} \cdot \text{dm}^{-3}$ ).

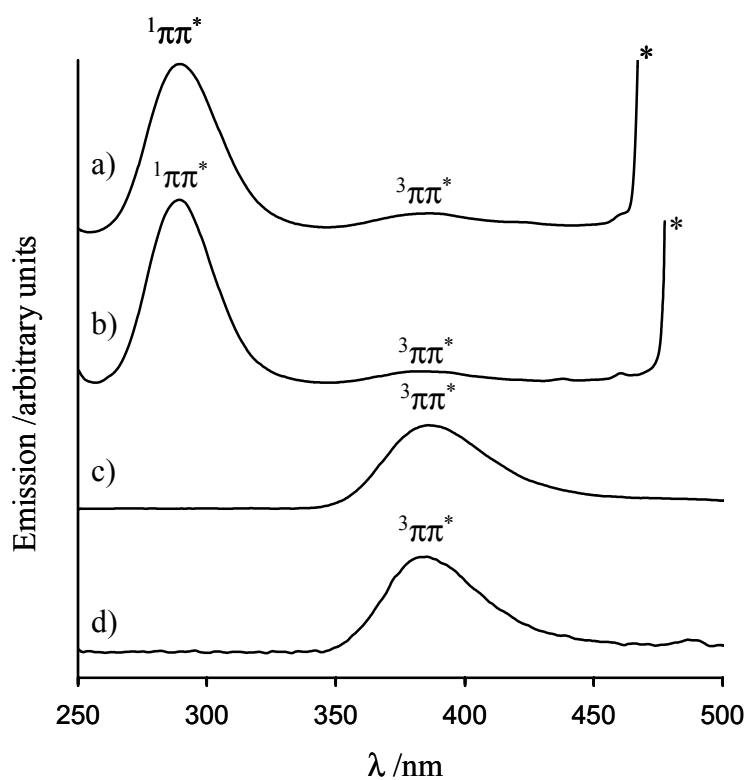

Figure S6 Fluorescence spectra of a)  $[\text{Gd}(\text{L6})_2](\text{CF}_3\text{SO}_3)_3$  (**2**,  $\lambda_{\text{exc}} = 41665 \text{ cm}^{-1}$ , 77K), b)  $[\text{Gd}(\text{L7})_2](\text{CF}_3\text{SO}_3)_3$  (**6**,  $\lambda_{\text{exc}} = 41150 \text{ cm}^{-1}$ , 77K), and time-resolved phosphorescence spectra (delay 0.1 ms) of c)  $[\text{Gd}(\text{L6})_2](\text{CF}_3\text{SO}_3)_3$  (**2**,  $\lambda_{\text{exc}} = 41665 \text{ cm}^{-1}$ , 77K) and d)  $[\text{Gd}(\text{L7})_2](\text{CF}_3\text{SO}_3)_3$  (**6**,  $\lambda_{\text{exc}} = 41150 \text{ cm}^{-1}$ , 77K). \* = Rayleigh band.

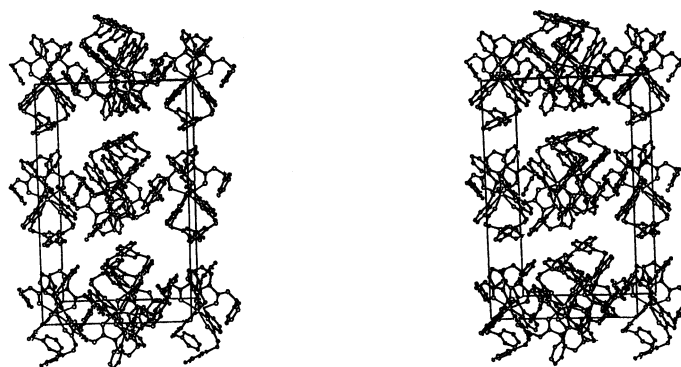

Figure S7 Stereoview of the unit cell in  $[\text{Tb}(\text{L8})_3]_2(\text{CF}_3\text{SO}_3)_6(\text{CH}_3\text{CH}_2\text{CN})_3(\text{H}_2\text{O})$  (**11**) highlighting the formation of layers parallel to the *ac* plane. Triflate anions and solvent molecules have been omitted for clarity.

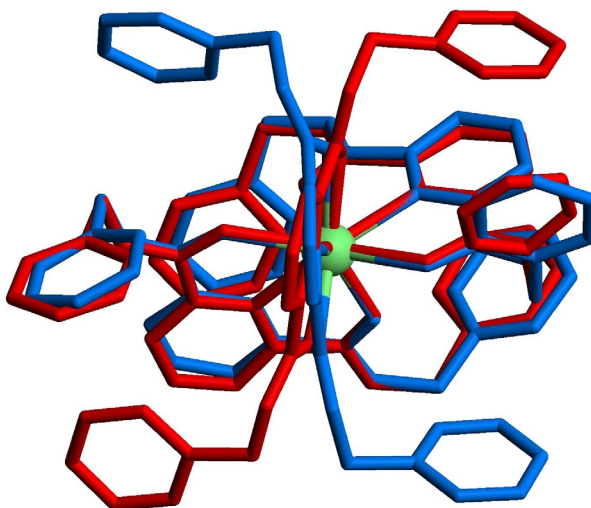

Figure S8 Superimposition of both cations of the asymmetric unit of **11** (red: **11a** ; blue: inverted structure of **11b**) showing that about 85% of the atoms are related by a pseudo centre of inversion and differ essentially by the orientations of two benzyl groups.
